# Supplementary material for: Analysis of MTNR1A Genetic Polymorphisms and Their Association with the Reproductive Performance Parameters in Two Mediterranean Sheep Breeds
Source: MDPI journal article supplement (doi:10.3390/ani13030448), 2023-01-28
Supplement: s1 [file s1]

Supplementary Table S1. Haplotypes and their frequency in all the ewes

| Haplotype | SNP1 | SNP2 | SNP3 | SNP4 | SNP5 | SNP6 | SNP7 | SNP8 | SNP9 | SNP10 | SNP11 | SNP12 | SNP13 | SNP14 | SNP15 | SNP16 | SNP17 | SNP18 | SNP19 | SNP20 | SNP21 | SNP22 | SNP23 | SNP24 | SNP25 | SNP26 | Freq<br>uenc<br>y | OR<br>(9<br>5%<br>CI)              | P-<br>val<br>ue |
|-----------|------|------|------|------|------|------|------|------|------|-------|-------|-------|-------|-------|-------|-------|-------|-------|-------|-------|-------|-------|-------|-------|-------|-------|-------------------|------------------------------------|-----------------|
| h1        | G    | C    | G    | C    | C    | C    | A    | C    | G    | T     | G     | A     | G     | C     | A     | G     | C     | G     | G     | G     | G     | G     | G     | C     | C     | C     | 0,29<br>61        | 1                                  | ---             |
| h2        | T    | T    | A    | T    | T    | T    | G    | C    | A    | G     | A     | G     | G     | T     | G     | G     | T     | G     | G     | G     | G     | G     | G     | C     | C     | C     | 0,10<br>39        | 10.<br>01<br>(1.<br>67<br>-<br>60. | 0,0<br>14       |

|    |   |   |   |   |   |   |   |   |   |   |   |   |   |   |   |   |   |   |   |   |   |   |   |   |   |    |      |     |     |     |    |  |
|----|---|---|---|---|---|---|---|---|---|---|---|---|---|---|---|---|---|---|---|---|---|---|---|---|---|----|------|-----|-----|-----|----|--|
|    |   |   |   |   |   |   |   |   |   |   |   |   |   |   |   |   |   |   |   |   |   |   |   |   |   |    |      |     |     |     | 05 |  |
|    |   |   |   |   |   |   |   |   |   |   |   |   |   |   |   |   |   |   |   |   |   |   |   |   |   |    |      |     |     |     | )  |  |
| h3 | T | C | G | T | T | T | A | C | A | G | A | G | G | T | A | G | T | G | G | G | A | A | G | T | A | C  | 0,09 | 0,8 |     |     |    |  |
|    |   |   |   |   |   |   |   |   |   |   |   |   |   |   |   |   |   |   |   |   |   |   |   |   |   | 09 | 18   | 6   | -   | 4.2 | 1) |  |
| h4 | G | C | G | C | C | C | A | C | G | T | G | A | A | C | A | T | C | A | G | A | G | G | G | T | C | C  | 0,08 | 0,1 |     |     |    |  |
|    |   |   |   |   |   |   |   |   |   |   |   |   |   |   |   |   |   |   |   |   |   |   |   |   |   | 7  | 78   | -   | 21. |     |    |  |

[illegible]

[illegible]

|         |   |   |   |   |   |   |   |   |   |   |   |   |   |   |   |   |   |   |   |   |   |   |   |   |   |   |            |                                              |                 |
|---------|---|---|---|---|---|---|---|---|---|---|---|---|---|---|---|---|---|---|---|---|---|---|---|---|---|---|------------|----------------------------------------------|-----------------|
| h1<br>0 | T | T | A | T | T | C | A | C | A | G | A | G | G | T | G | T | C | A | G | A | G | G | G | T | C | C | 0,01<br>95 | 0.7<br>3<br>(0.<br>04<br>-<br>12.<br>47<br>) | 0,8<br>3        |
| h1<br>1 | G | C | G | C | C | C | A | C | G | T | G | A | G | C | A | G | T | G | G | G | G | G | G | C | C | T | 0,01<br>3  | 0                                            | 1               |
| h1<br>2 | T | C | G | T | C | C | A | C | A | G | A | G | G | T | A | G | T | G | G | G | A | A | G | T | A | C | 0,01<br>3  | 0                                            | 1               |
| h1<br>3 | T | C | G | T | T | C | A | T | A | G | A | G | A | T | A | G | T | G | A | G | G | G | G | C | C | C | 0,01<br>3  | -                                            | <0.<br>000<br>1 |

|         |   |   |   |   |   |   |   |   |   |   |   |   |   |   |   |   |   |   |   |   |   |   |   |   |   |   |           |                                              |          |
|---------|---|---|---|---|---|---|---|---|---|---|---|---|---|---|---|---|---|---|---|---|---|---|---|---|---|---|-----------|----------------------------------------------|----------|
| h1<br>4 | T | T | A | T | T | C | G | C | A | G | A | G | G | T | G | T | C | A | G | A | G | G | G | T | C | C | 0,01<br>3 | 4.0<br>8<br>(0.<br>19<br>-<br>87.<br>83<br>) | 0,3<br>7 |
| h1<br>5 | T | T | A | T | T | T | G | C | A | G | A | G | G | T | G | T | C | A | G | A | A | G | G | T | C | C | 0,01<br>3 | 0                                            | 1        |

**Supplementary Table S2.** Results of the first year in the studied ewes from both breeds: DTL, fertility rate, and litter size for each genotype at SNP17.

| SNP      | SNP17 |     |     | P |
|----------|-------|-----|-----|---|
| Genotype | T/T   | T/C | C/C |   |

|                       |                |                |                |     |
|-----------------------|----------------|----------------|----------------|-----|
| DTL<br>(days)         | 208.215±23.590 | 215.407±27.228 | 198.500±18.299 | n.s |
| Fertility<br>rate (%) | 100            | 100            | 100 %          | n.s |
| Litter size           | 1.058±0.237    | 1.296±0.465    | 1.125±0.353    | n.s |

**Supplementary Table S3.** Results of the second year in the studied ewes from both breeds: DTL, fertility rate, and litter size for each genotype at SNP17.

| SNP           | SNP17          |                |                | P      |
|---------------|----------------|----------------|----------------|--------|
| Genotype      | T/T            | T/C            | C/C            |        |
| DTL<br>(days) | 204.827±20.918 | 215.250±25.898 | 208.500±16.266 | P<0,05 |

|                       |             |             |             |        |
|-----------------------|-------------|-------------|-------------|--------|
|                       |             |             |             |        |
| Fertility<br>rate (%) | 100         | 100         | 100 %       | n.s    |
| Litter size           | 1.094±0.295 | 1.160±0.374 | 1.000±0.307 | P<0,05 |

**Supplementary Table S4.** Results of the first year in the studied ewes from both breeds: DTL, fertility rate, and litter size for each genotype at SNP18/SNP20.

| SNP           | SNP18          |                |                | P   | SNP20          |                |                | P   |
|---------------|----------------|----------------|----------------|-----|----------------|----------------|----------------|-----|
| Genotype      | G/G            | G/A            | A/A            |     | G/G            | G/A            | A/A            |     |
| DTL<br>(days) | 207.283±23.539 | 211.090±21.480 | 201.000±17.981 | n.s | 207.283±23.539 | 211.090±21.480 | 201.000±17.981 | n.s |



|                    |             |             |           |     |            |             |           |     |
|--------------------|-------------|-------------|-----------|-----|------------|-------------|-----------|-----|
| Fertility rate (%) | 100         | 100         | 100 %     | n.s | 100        | 100         | 100       | n.s |
| Litter size        | 1.066±0.251 | 1.240±0.435 | 1.00±0.00 | n.s | 1.06±0.251 | 1.142±0.358 | 1.00±0.00 | n.s |

**Supplementary Table S5.** Results of the second year in the studied ewes from both breeds: DTL, fertility rate, and litter size for each genotype at SNP18/SNP20.

| SNP                | SNP18          |                |                | P      | SNP20          |                |               | P      |
|--------------------|----------------|----------------|----------------|--------|----------------|----------------|---------------|--------|
| Genotype           | G/G            | G/A            | A/A            |        | G/G            | G/A            | A/A           |        |
| DTL (days)         | 209.866±23.903 | 207.181±17.206 | 222.500±11.269 | P<0,05 | 209.866±23.903 | 207.181±17.206 | 222.500±11.27 | P<0,05 |
| Fertility rate (%) | 100            | 100            | 100 %          | n.s    | 100            | 100            | 100           | n.s    |
| Litter size        | 1.083±0.278    | 1.136±0.351    | 1.00±0.00      | n.s    | 1.083±0.278    | 1.150±0.366    | 1.00±0.00     | n.s    |

**Supplementary Table S6.** Results of lambs' birth weights for the three years in the studied ewes from both breed

Data are expressed as LSmeans.

| SNP                | SNP18       |             |             | P      | SNP20       |             |             | P      |
|--------------------|-------------|-------------|-------------|--------|-------------|-------------|-------------|--------|
| Lambs birth weight | G/G         | G/A         | A/A         |        | G/G         | G/A         | A/A         |        |
| 2017               | 3.714±0.445 | 3.529±0.484 | 3.900±0.355 | n.s    | 3.714±0.445 | 3.552±0.482 | 3.720±0.506 | n.s    |
| 2018               | 3.641±0.699 | 3.452±0.472 | 3.900±0.648 | n.s    | 3.641±0.699 | 3.408±0.428 | 4.020±0.622 | n.s    |
| 2019               | 4.553±0.945 | 3.900±0.529 | 4.150±0.070 | P<0,05 | 4.378±0.868 | 4.420±0.851 | 5.900±0.000 | P<0,05 |

**Supplementary Table S7.** Results of lambs' birth weights for the three years in the studied ewes from both breed

Data are expressed as LSmeans.

| SNP                | SNP17       |             |             | P      |
|--------------------|-------------|-------------|-------------|--------|
| Lambs birth weight | T/T         | T/C         | C/C         |        |
| 2017               | 2.674±0.864 | 2.951±0.897 | 3.025±0.686 | n.s    |
| 2018               | 2.758±0.924 | 2.881±0.797 | 3.562±0.992 | P<0,05 |
| 2019               | 3.052±1.122 | 3.563±1.094 | 4.112±1.124 | P<0,05 |

**Supplementary Table S8.** Results of the first year in the studied Barbarine ewes: DTL, fertility rate, litter size and lambs birth weights for each genotype at SNP18/SNP20.

Data are expressed as LSmeans.

| SNP | SNP18 | P | SNP20 | P |
|-----|-------|---|-------|---|
|-----|-------|---|-------|---|

| Genotype              | G/G          | G/A            | A/A            |        | G/G          | G/A            | A/A            |        |
|-----------------------|--------------|----------------|----------------|--------|--------------|----------------|----------------|--------|
| DTL<br>(days)         | 200.9±17.808 | 203.545±12.832 | 213.000±19.798 | P<0,05 | 200.9±17.808 | 203.545±12.832 | 213.000±19.798 | P<0,05 |
| Fertility<br>rate (%) | 100          | 100            | 100            | n.s    | 100          | 100            | 100            | n.s    |
| Litter size           | 1.00±0.00    | 1.00±0.00      | 1.00±0.00      | n.s    | 1.00±0.00    | 1.00±0.00      | 1.00±0.00      | n.s    |

**Supplementary Table S9.** Results of the second year in the studied Barbarine ewes: DTL, fertility rate, litter size and lambs birth weights for each genotype at SNP18/SNP20.

Data are expressed as LSmeans.

| SNP      | SNP18 |     |     | P | SNP20 |     |     | P |
|----------|-------|-----|-----|---|-------|-----|-----|---|
| Genotype | G/G   | G/A | A/A |   | G/G   | G/A | A/A |   |

|                    |                |                |                |     |                |                |                |     |
|--------------------|----------------|----------------|----------------|-----|----------------|----------------|----------------|-----|
| DTL (days)         | 208.633±26.711 | 208.090±13.838 | 214.500±10.606 | n.s | 208.633±26.711 | 208.090±13.838 | 214.500±10.606 | n.s |
| Fertility rate (%) | 100            | 100            | 100            | n.s | 100            | 100            | 100            | n.s |
| Litter size        | 1.066±0.253    | 1.00±0.00      | 1.00±0.00      | n.s | 1.066±0.253    | 1.00±0.00      | 1.00±0.00      | n.s |

**Supplementary Table S10.** Results of the first year in the studied ewes from Barbarine breed: DTL, fertility rate, and litter size for each genotype at SNP17.

| SNP                | SNP17          |                |                | P   |
|--------------------|----------------|----------------|----------------|-----|
| Genotype           | T/T            | T/C            | C/C            |     |
| DTL (days)         | 211.875±12.182 | 198.125±18.518 | 201.421±15.510 | n.s |
| Fertility rate (%) | 100            | 100            | 100 %          | n.s |

|             |             |             |             |     |
|-------------|-------------|-------------|-------------|-----|
| Litter size | 1.000±0.000 | 1.000±0.000 | 1.000±0.000 | n.s |
|-------------|-------------|-------------|-------------|-----|

**Supplementary Table S11.** Results of the second year in the studied ewes from Barbarine breed: DTL, fertility rate, and litter size for each genotype at SNP17.

| SNP                   | SNP17         |                |                | P   |
|-----------------------|---------------|----------------|----------------|-----|
| Genotype              | T/T           | T/C            | C/C            |     |
| DTL<br>(days)         | 192.000±9.227 | 223.312±30.377 | 203.578±11.072 | n.s |
| Fertility<br>rate (%) | 100           | 100            | 100 %          | n.s |
| Litter size           | 1.125±0.353   | 1.000±0.000    | 1.052±0.229    | n.s |

**Supplementary Table S12.** Results of the first year in the studied Queue Fine de l'Ouest ewes: DTL, fertility rate, litter size and lambs birth weights for each genotype at SNP18/SNP20.

Data are expressed as LSmeans.

| SNP                   | SNP18          |                |               | P   | SNP20          |                |                | P   |
|-----------------------|----------------|----------------|---------------|-----|----------------|----------------|----------------|-----|
| Genotype              | G/G            | G/A            | A/A           |     | G/G            | G/A            | A/A            |     |
| DTL<br>(days)         | 213.666±26.942 | 218.636±26.058 | 189.000±1.414 | n.s | 213.666±26.942 | 213.800±21.647 | 215.000±45.044 | n.s |
| Fertility<br>rate (%) | 100            | 100            | 100           | n.s | 100            | 100            | 100            | n.s |
| Litter<br>size        | 1.00±0.00      | 1.00±0.00      | 1.00±0.00     | n.s | 1.133±0.345    | 1.300±0.483    | 1.000±0.00     | n.s |

**Supplementary Table S13.** Results of the second year in the studied Queue Fine de l'Ouest ewes: DTL, fertility rate, litter size and lambs birth weights for each genotype at SNP18/SNP20.

Data are expressed as LSmeans.

| SNP                   | SNP18          |                |               | P   | SNP20          |                |                | P   |
|-----------------------|----------------|----------------|---------------|-----|----------------|----------------|----------------|-----|
| Genotype              | G/G            | G/A            | A/A           |     | G/G            | G/A            | A/A            |     |
| DTL<br>(days)         | 210.800±20.705 | 206.272±20.698 | 230.500±3.530 | n.s | 211.100±21.114 | 207.500±21.391 | 218.333±21.221 | n.s |
| Fertility<br>rate (%) | 100            | 100            | 100           | n.s | 100            | 100            | 100            | n.s |
| Litter<br>size        | 1.100±0.305    | 1.272±0.467    | 1.000±0.00    | n.s | 1.100±0.305    | 1.300±0.483    | 1.000±0.00     | n.s |



**Supplementary Table S14.** Results of the first year in the studied ewes from QFO breed: DTL, fertility rate, and litter size for each genotype at SNP17.

| SNP                   | SNP17          |                |                | P   |
|-----------------------|----------------|----------------|----------------|-----|
| Genotype              | T/T            | T/C            | C/C            |     |
| DTL<br>(days)         | 207.619±18.869 | 224.312±30.240 | 207.333±33.678 | n.s |
| Fertility<br>rate (%) | 100            | 100            | 100 %          | n.s |
| Litter size           | 1.142±0.358    | 1.250±0.447    | 1.000±0.000    | n.s |

**Supplementary Table S15.** Results of the second year in the studied ewes from QFO breed: DTL, fertility rate, and litter size for each genotype at SNP17.

| SNP | SNP17 |  |  | P |
|-----|-------|--|--|---|
|-----|-------|--|--|---|

| Genotype              | T/T            | T/C            | C/C            |        |
|-----------------------|----------------|----------------|----------------|--------|
| DTL<br>(days)         | 209.714±22.179 | 207.187±18.019 | 224.000±21.175 | n.s    |
| Fertility<br>rate (%) | 100            | 100            | 100 %          | n.s    |
| Litter size           | 1.047±0.218    | 1.312±0.478    | 1.000±0.000    | P<0,05 |

**Supplementary Table S16.** Results of lambs birth weights for the three years in the studied Barbarine and QFO ewes breed

Data are expressed as LSmeans.

| SNP      | SNP18 |     |     | P | SNP20 |     |     | P |
|----------|-------|-----|-----|---|-------|-----|-----|---|
| Genotype | G/G   | G/A | A/A |   | G/G   | G/A | A/A |   |

|                     |      |             |             |             |        |             |             |             |        |
|---------------------|------|-------------|-------------|-------------|--------|-------------|-------------|-------------|--------|
| Lambs birth weights |      |             |             |             |        |             |             |             |        |
| Barbarine ewes      | 2017 | 3.813±0.394 | 3.827±0.355 | 4.150±0.070 | n.s    | 3.813±0.394 | 3.827±0.355 | 4.150±0.070 | n.s    |
|                     | 2018 | 3.653±0.867 | 3.372±0.363 | 3.750±1.060 | n.s    | 3.653±0.867 | 3.372±0.363 | 3.750±1.060 | n.s    |
|                     | 2019 | 4.670±1.107 | 4.700±1.019 | 6.500±0.721 | P<0,05 | 4.670±1.107 | 4.700±1.019 | 6.500±0.721 | P<0,05 |
| QFO ewes            | 2017 | 3.624±0.475 | 3.276±0.441 | 3.650±0.353 | n.s    | 3.624±0.475 | 3.276±0.441 | 3.650±0.353 | n.s    |
|                     | 2018 | 3.630±0.499 | 3.514±0.548 | 4.050±0.212 | n.s    | 3.630±0.499 | 3.438±0.489 | 4.200±0.300 | n.s    |
|                     | 2019 | 4.096±0.397 | 4.072±0.272 | 4.600±0.141 | n.s    | 4.096±0.713 | 4.030±0.775 | 4.566±0.666 | n.s    |

**Supplementary Table S17.** Primer sequences information and PCRs.

| Gene | Region | Primers (5 ➡ 3') | Primer size (pb) | PCR Product size (pb) | PCR optimized conditions in °C | Références |
|------|--------|------------------|------------------|-----------------------|--------------------------------|------------|
|      |        |                  |                  |                       |                                |            |

|            |          |                                                                                           |              |      |                                                                                                                                                |                |                                                                        |
|------------|----------|-------------------------------------------------------------------------------------------|--------------|------|------------------------------------------------------------------------------------------------------------------------------------------------|----------------|------------------------------------------------------------------------|
| MTN<br>RIA | Promoter | <b>Fragment 1 :</b><br><br>Fw:<br>GCACAAAAAGAAGCCAAGGA<br><br>Rv:<br>TCAGGTGTCGCACTGTAACC | 20<br><br>20 | 777  | Initialisation 94°C 3 min<br>Denaturation 94°C 1 min<br>Annealing 61°C 1 min<br>Extension 61°C 1 min<br>Final elongation 72°C 10 min           | }<br>35 cycles | (Cosso, Nehme et al. 2021)<br><br>(Martinez-Royo, Alabart et al. 2012) |
|            | Promoter | <b>Fragment 2 :</b><br><br>Fw:<br>TGTTCTGGGAGAAGTCTGG<br><br>Rv:<br>CATGCATCAAACCTGGACTG  | 20<br><br>20 | 721  | Initialisation 94°C 3 min<br>Denaturation 94°C 1 min<br>cycles<br>Annealing 60°C 1 min<br>Extension 72°C 1 min<br>Final elongation 72°C 10 min | }<br>35        |                                                                        |
|            |          | <b>Fragment 3 :</b><br><br>FW :<br>GGCCCTAACCCATGTTTCT<br><br>Rv: CTCCCACTCTGTTCCCTGAA    | 20           | 1157 | Initialisation 94°C 3 min<br>Denaturation 94°C 1 min<br>Annealing 54°C 1 min                                                                   | }<br>35 cycles |                                                                        |

|  |                 |  |    |  |                                                      |  |
|--|-----------------|--|----|--|------------------------------------------------------|--|
|  | Exon2/3'<br>UTR |  | 20 |  | Extension 72°C 1 min<br>Final elongation 72°C 10 min |  |
|--|-----------------|--|----|--|------------------------------------------------------|--|
